# Supplementary material for: Fluorescent diphenylfluorene-pyrenyl copolymer with dibenzothiophene-S,S-dioxide and adamantane units for explosive vapor detection
Source: Royal Society of Chemistry journal article supplement (doi:10.1039/c4ra12966k), 2014-12-05
Supplement: c4ra12966k1.pdf [file c4ra12966k1.pdf]

# Fluorescent Diphenylfluorene-pyrenyl Copolymer with Dibenzothiophene-S, S-dioxide and Adamantine Units for Explosive Vapor Detection

Yuerong Wang<sup>a,b</sup>, Yixun Gao<sup>a,b</sup>, Lei Chen<sup>a,b</sup>, Yanyan Fu<sup>a</sup>, Defeng Zhu<sup>a</sup>, Qingguo He<sup>\*a</sup>, Huimin Cao<sup>a</sup>, Jiangong Cheng<sup>\*a</sup>, Runsheng Zhang<sup>c</sup>, Shuiqing Zheng<sup>c</sup>, Songmao Yan<sup>c</sup>

<sup>a</sup>State Key Laboratory of Transducer Technology, Shanghai Institute of Microsystem and Information Technology, Chinese Academy of Sciences, 865 Changning Road, Shanghai 200050, China. Fax: 86-21-62511070-8934; Tel: 86-21-62511070-8967; E-mail: hqg@mail.sim.ac.cn (Q. G. He), jgcheng@mail.sim.ac.cn (J. G. Cheng).

<sup>b</sup>University of Chinese Academy of Sciences, 19 Yuquan Road, Beijing 100039, China

<sup>c</sup>Shanghai Key Laboratory of Crime Scene Evidence, Shanghai Institute of Forensic Science, 803 North ZhongShan No.1 Road, , Shanghai 200083, China.

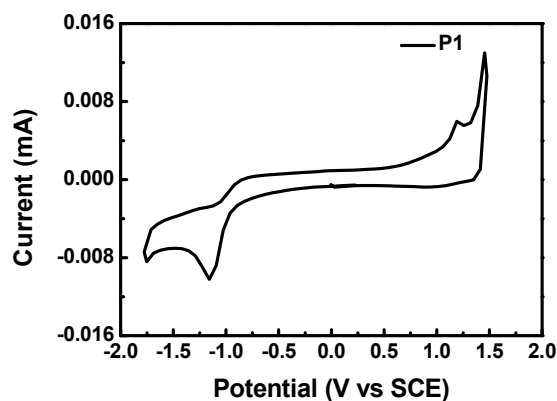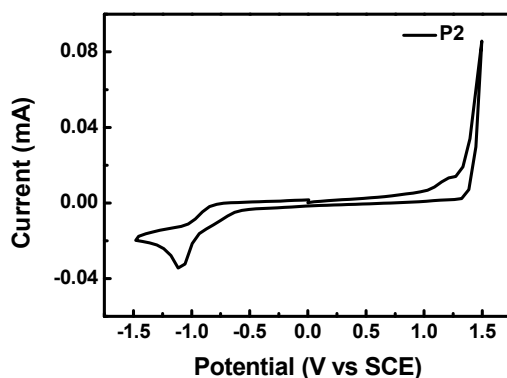

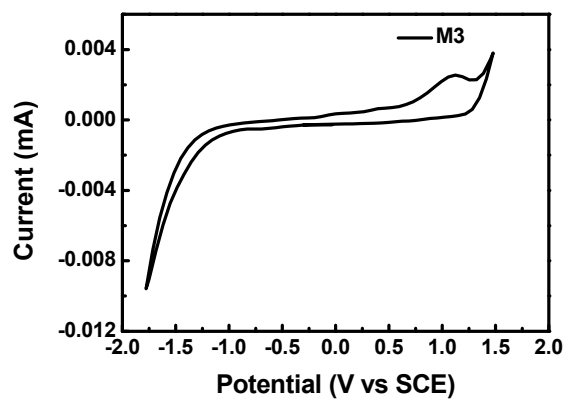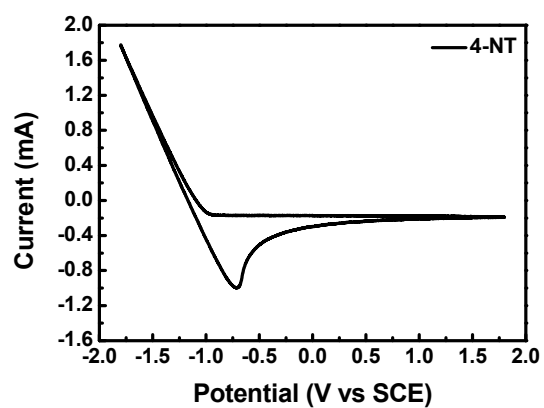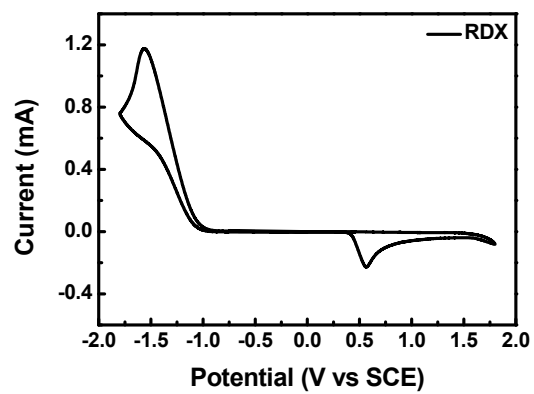

Fig. S1 The CV curves of P1, P2, M3, 4-NT and RDX in  $\text{CH}_3\text{CN}$  solution at a sweep rate of  $100 \text{ mVs}^{-1}$ .

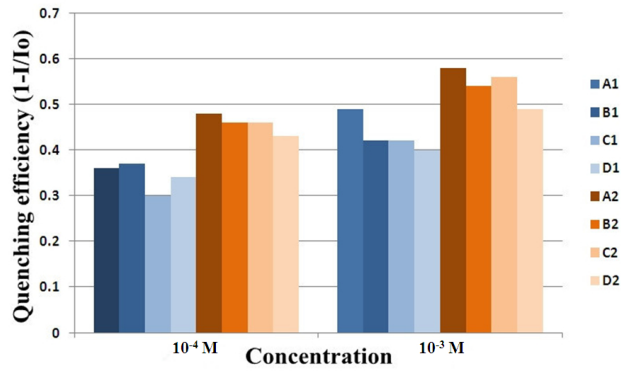

Fig. S2 Quenching efficiencies of P1 and P2 films (Blue: P1, Yellow: P2; spin-toluene (A1, A2), spin-tetrahydrofuran (B1, B2), dip-toluene (C1, C2), dip-tetrahydrofuran (D1, D2).) exposed to saturated TNT vapor for 300 s.

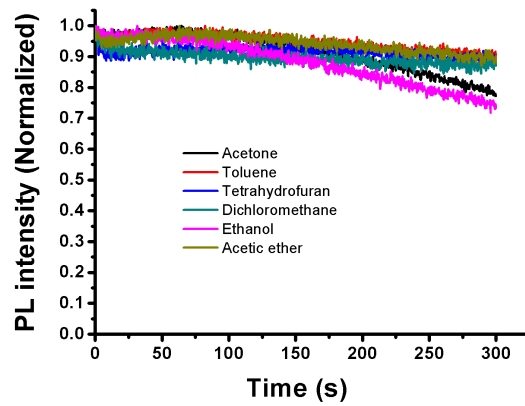

Fig. S3 Sensing properties of P2 film (spin-coated; toluene: 10<sup>-3</sup> M) exposed to saturated vapor of common solvents.

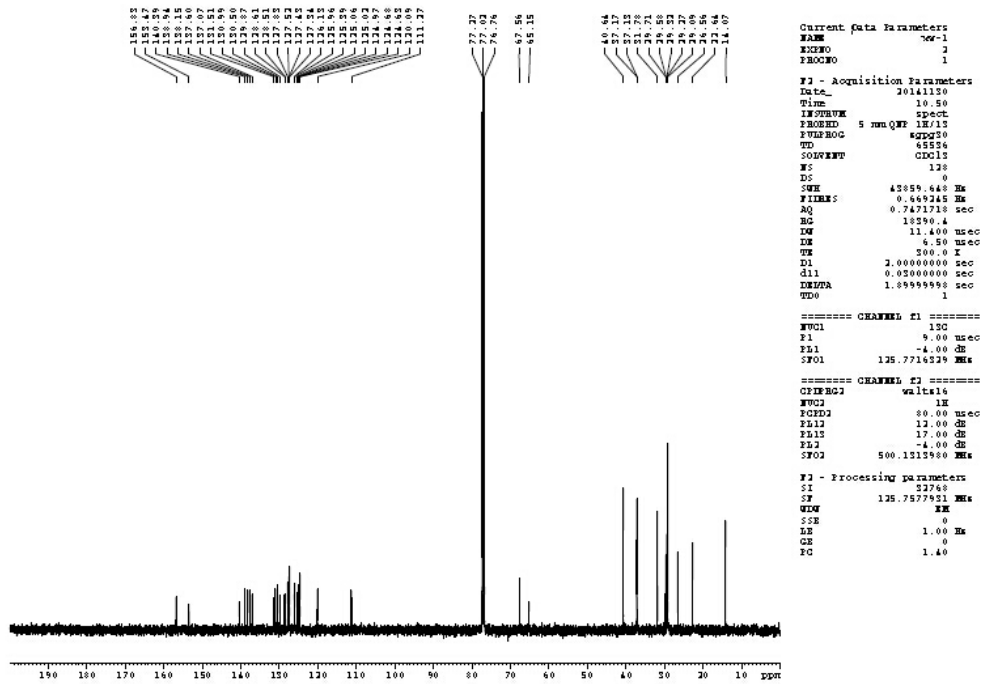

Fig. S4 <sup>13</sup>C-NMR of M3
